# Supplementary material for: Altered protein prenylation in Sertoli cells is associated with adult infertility resulting from childhood mumps infection
Source: PubMed Central journal article supplement — J Exp Med. 2013 Jul 29;210(8):1559–74. doi: 10.1084/jem.20121806 (PMC3727317; doi:10.1084/jem.20121806), 2013-07-29
Supplement: supp_jem.20121806_JEM_20121806_sm.pdf [file supp_jem.20121806_JEM_20121806_sm.pdf]

## SUPPLEMENTAL MATERIAL

Wang et al., <http://www.jem.org/cgi/content/full/jem.20121806/DC1>**Table S1.** Primer sequences

| Gene symbol                    | Forward primer<br>(5'-3')     | Reverse primer<br>(5'-3')    |
|--------------------------------|-------------------------------|------------------------------|
| <i>Cre</i>                     | GCGGTCTGGCAGTAAAACTATC        | AATTGTGTGTGGTAGGGGTA         |
| <i>LoxP</i>                    | GTGAAACAGCATTGCTGCACTT        | AACTTGCTCAG AACTGAGC         |
| <i>mGGPPS</i>                  | TTACCAACACCTGTAATC            | TTATTGACAAGCCCAGAGC          |
| <i>hGGPPS</i>                  | TGGAGAAGACTCAAGAAACAG         | TCAGCCAATGATTAATGCC          |
| <i>IL-1<math>\alpha</math></i> | TGAAGAAGAGACGGCTGAG           | AGTGTTGTCCACATCCTG           |
| <i>IL-1<math>\beta</math></i>  | GCAACTGTTCTGAACTCAACT         | ATCTTTGGGGTCCGTCAACT         |
| <i>IL-6</i>                    | AGCCAGAGTCCTCAGAGA            | GGATGGTCTTGGTCTTAG           |
| <i>TNF</i>                     | CCCTCACACTCAGATCATCTCT        | GCTACGACGTGGGTACAG           |
| <i>FASL</i>                    | TCCGTGAGTTCACCAACAAA          | GGGGTCCCTGTAAATGGG           |
| <i>CCL2</i>                    | TTAAAACTGGATCGGAACCAA         | GCATTAGCTCAGATTTACGGGT       |
| <i>CCL3</i>                    | CCTGCTGCTTCTCCTACA            | TCCAAGACTCTCAGGCATT          |
| <i>CXCL2</i>                   | CCCTGGTTCAGAAAATCATC          | TCAGACAGCGAGGCACAT           |
| <i>CXCL3</i>                   | CACTCTCAAGGATGGTCAAG-         | AGACACCGTTGGGATGGAT          |
| <i>CXCL5</i>                   | GAAGGAGTCTGTCTGGAT            | TCATCAAAGCAGGGAGTTC          |
| <i>18S</i>                     | GTCTGTGATGCCCTTAGATG          | AGCTTATGACCCGCACCTAC         |
| <i>H-RAS</i>                   | TATTTGCCATCAACAACACC          | GCCGAATCTCACGGACTA           |
| <i>H-RAS-wt</i>                | GAATTCATGACAGAATAACAAGCTTGTGG | CTCGAGTCAGGACAGCACACATTGCA   |
| <i>H-RAS-186S</i>              | GAATTCATGACAGAATAACAAGCTTGTGG | CTCGAGTCAGGACAGCACGCTTTTGCAG |
| <i>hGGPPS-m1</i>               | TTAGTTGATTTGGAGGGGAAA         | ACAAACCCCTCAACCCCT           |
| <i>hGGPPS-m2</i>               | GGTTGTTGAGGTAGAGGTTT          | AAACTTTAAACCAATCCAAAATC      |
| <i>hGGPPS-m3</i>               | GGGAGYGAGATTAATATTG           | AAACCTCTACCTCAACAACC         |
| <i>mGGPPS-m1</i>               | TGGAGGGGAAATAAAGATAT          | ACTCCCACTATAAACCTTAAC        |
| <i>mGGPPS-m2</i>               | GAGTTAAGGTTTATAAGTGGGAGT      | TCTCCCCACAAACCTACT           |
| <i>mGGPPS-m3</i>               | TAGTAGGTTTGTGGGAGAGAG         | CCCAATCCTAAATCRTCTAAAAA      |
| <i>mGGPPS-m4</i>               | TTGGGTAGGATTTTTGGAGTT         | CTTCCTAAAAACCTCCCACTA        |
